# Supplementary figures and images for: High cholesterol level is essential for myelin membrane growth
Source: Springer Nature journal article supplement (doi:10.1038/nn1426), 2005-03-27

Control

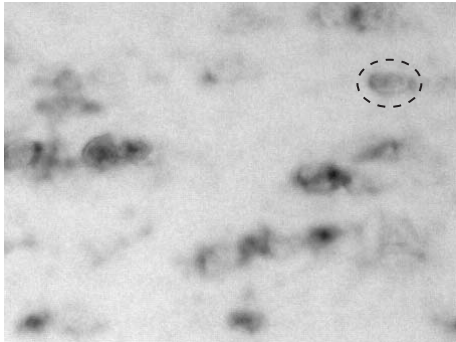

Mutant

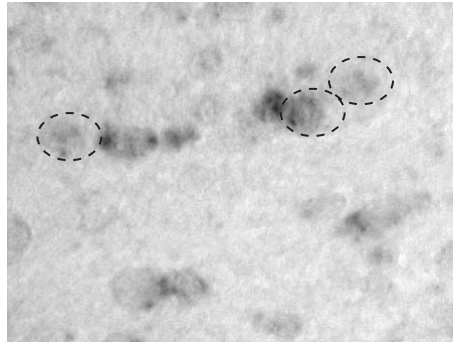

HMG CoA red.  
(in situ hyb.)

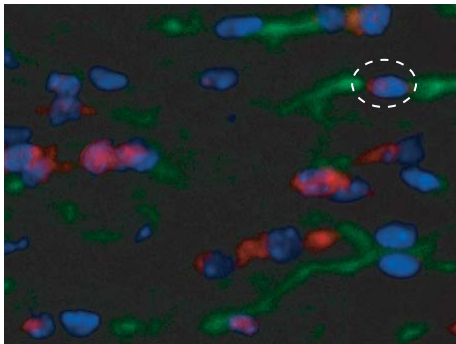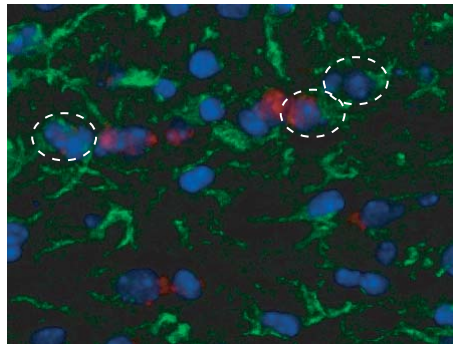

GFAP  
DAPI  
HMG CoA red.  
(pseudocolored)

Supplement: 41593_2005_BFnn1426_MOESM4_ESM.pdf [file 41593_2005_BFnn1426_MOESM4_ESM.pdf]
